# Supplementary material for: Monomers and dimers of fullerenes in the radical anion salts with dyes, (astrophloxine+)2(C60˙−)2 and (astrophloxine+)2(C70−)2: suppression of the C60˙− dimerization by π-stacking
Source: Royal Society of Chemistry journal article supplement (doi:10.1039/d4nj01402b), 2024-01-01
Supplement: d4nj01402b1.pdf [file d4nj01402b1.pdf]

**Supporting information for the manuscript:**

**Monomers and dimers of C<sub>60</sub> and C<sub>70</sub> in the radical anion salts with dyes,  
(astrophloxine<sup>+</sup>)<sub>2</sub>(C<sub>60</sub><sup>•-</sup>)<sub>2</sub> and (astrophloxine<sup>+</sup>)<sub>2</sub>(C<sub>70</sub><sup>-</sup>)<sub>2</sub>: suppression of the C<sub>60</sub><sup>•-</sup>  
dimerization by  $\pi$ -stacking**

Pavel A. Sobov,<sup>a</sup> Maxim A. Faraonov,<sup>a</sup> Salavat S. Khasanov,<sup>b</sup> Akihiro Otsuka,<sup>c</sup>

Hideki Yamochi,<sup>c</sup> Hiroshi Kitagawa,<sup>c</sup> Dmitri V. Konarev<sup>a</sup>

<sup>a</sup> Federal Research Center of Problems of Chemical Physics and Medicinal Chemistry  
RAS, Chernogolovka, Moscow region, 142432 Russia

<sup>b</sup> Institute of Solid State Physics RAS, Chernogolovka, Moscow region, 142432 Russia

<sup>c</sup> Division of Chemistry, Graduate School of Science, Kyoto University, Sakyo-ku, Kyoto 606-  
8502, Japan.

Supporting information.

Table S1. IR-spectra (cm<sup>-1</sup> in KBr pellets) of starting compounds and salts **1** and **2**.

| Components                                    | C <sub>60</sub>                | C <sub>70</sub>                                                                 | astrophloxine                                                                                                                                                                                                                                                                                                | C <sub>6</sub> H <sub>4</sub> Cl <sub>2</sub> | (astrophloxine <sup>+</sup> ) <sub>2</sub><br>(C <sub>60</sub> <sup>•+</sup> ) <sub>2</sub> ·C <sub>6</sub> H <sub>4</sub> Cl <sub>2</sub> ·<br>C <sub>6</sub> H <sub>14</sub> ( <b>1</b> )                                                                                                         | (astrophloxine <sup>+</sup> ) <sub>2</sub><br>(C <sub>70</sub> <sup>•+</sup> ) <sub>2</sub> ( <b>2</b> )                                                                                                                                                                                 |
|-----------------------------------------------|--------------------------------|---------------------------------------------------------------------------------|--------------------------------------------------------------------------------------------------------------------------------------------------------------------------------------------------------------------------------------------------------------------------------------------------------------|-----------------------------------------------|-----------------------------------------------------------------------------------------------------------------------------------------------------------------------------------------------------------------------------------------------------------------------------------------------------|------------------------------------------------------------------------------------------------------------------------------------------------------------------------------------------------------------------------------------------------------------------------------------------|
| C <sub>60</sub>                               | 524s<br>574s<br>1180s<br>1427s |                                                                                 |                                                                                                                                                                                                                                                                                                              |                                               | 524w<br>574s<br>-<br>1396s                                                                                                                                                                                                                                                                          |                                                                                                                                                                                                                                                                                          |
| C <sub>70</sub>                               |                                | 457w<br>534s<br>564m<br>576s<br>642m<br>673m<br>794m<br>1132w<br>1413w<br>1429s |                                                                                                                                                                                                                                                                                                              |                                               |                                                                                                                                                                                                                                                                                                     | -<br>530m*<br>-<br>576m<br>-<br>680w<br>801m<br>1127m<br>-<br>1399m 1427s*                                                                                                                                                                                                               |
| Astrophloxine                                 |                                |                                                                                 | 423m<br>460m<br>467m<br>532w; 542w<br>548w<br>666s<br>681w<br>688w<br>725m<br>736m<br>750s<br>767s<br>868s<br>910s<br>936s<br>962s<br>1006s<br>1029m<br>1064s<br>1074w<br>1102s<br>1111m<br>1144w<br>1174m<br>1181s<br>1222m<br>1239s<br>1268<br>1298w<br>1323m<br>1356s<br>1412s<br>1443s<br>1478m<br>1539s |                                               | 425w<br>-<br>476w<br>512w; 525w<br>-<br>-<br>680m<br>693w<br>725w<br>745s<br>754s<br>772s<br>855m<br>924s<br>940w<br>962w<br>1019m<br>1031w<br>1075s<br>1084m<br>-<br>1114s; 1126s<br>1155m<br>1174m<br>-<br>1230m<br>1252m<br>1273m<br>1305w<br>1338m<br>1368m<br>1428s<br>1454s<br>1477m<br>1556s | 424w<br>-<br>474w<br>530w*<br>-<br>667w<br>680w<br>-<br>-<br>749m<br>757w<br>774s<br>858w<br>922s<br>942w<br>962w<br>1019m<br>-<br>1075s<br>1088m<br>-<br>1114s; 1127s<br>1159m<br>1175m<br>-<br>1230m<br>1252m<br>1275m<br>1305w<br>1337m<br>1366m<br>1427s*<br>1456s<br>1477m<br>1557s |
| C <sub>6</sub> H <sub>4</sub> Cl <sub>2</sub> |                                |                                                                                 |                                                                                                                                                                                                                                                                                                              | 663w<br>751s<br>1035m<br>1120s<br>1462m       | 659w<br>753w<br>1032w<br>-<br>1465w                                                                                                                                                                                                                                                                 |                                                                                                                                                                                                                                                                                          |

\*bands coincide, w - weak, m - middle, s – strong intensity.

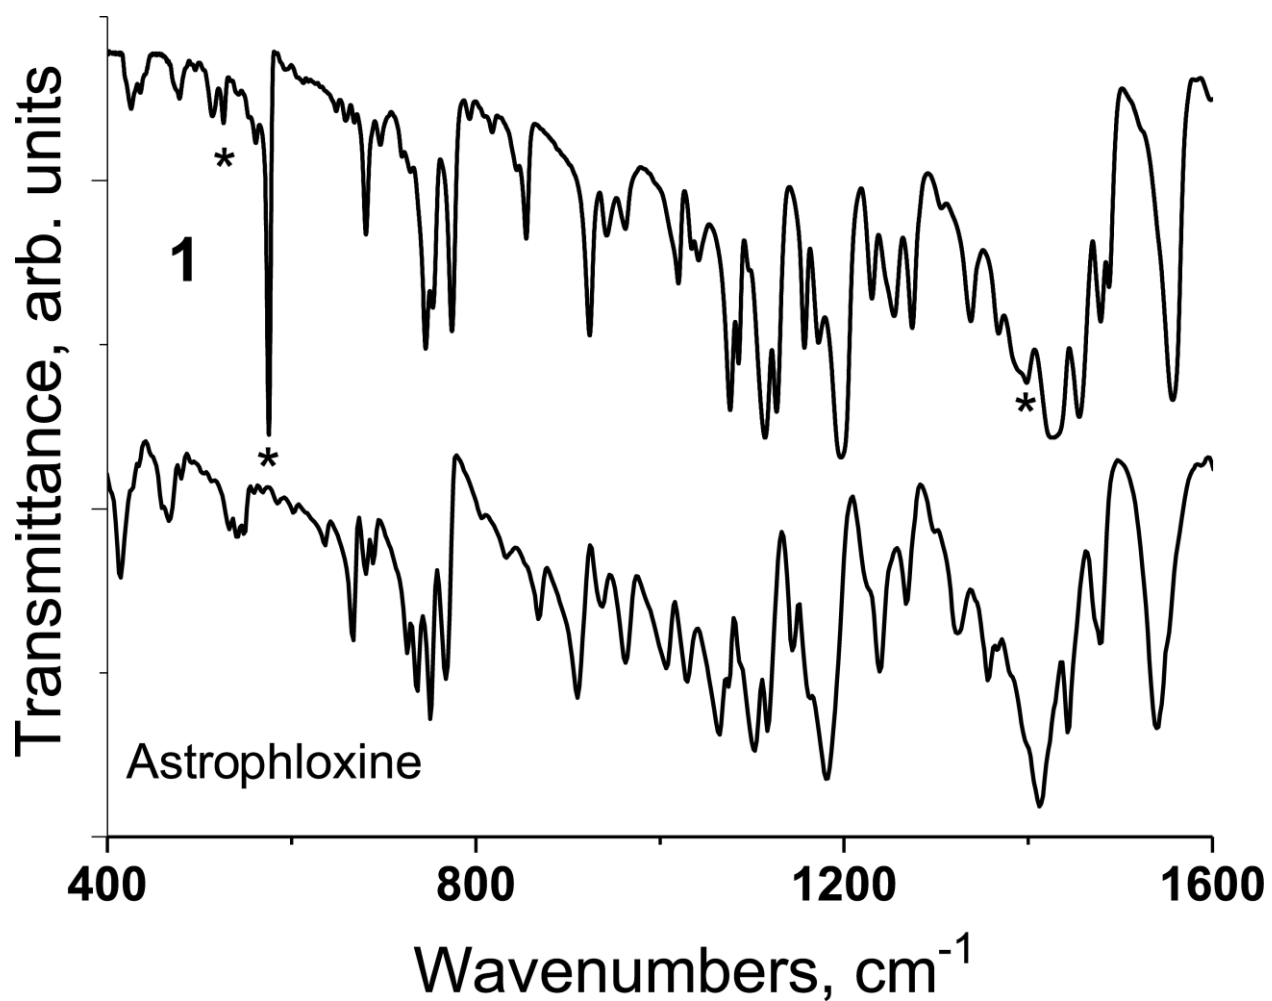

**Fig. S1.** Spectrum of  $(\text{astrophloxine}^+)_2(\text{C}_{60}^{\bullet-})_2 \cdot \text{C}_6\text{H}_4\text{Cl}_2 \cdot \text{C}_6\text{H}_{14}$  (**1**) in a KBr pellet prepared in anaerobic conditions. Spectrum of starting astrophloxine in KBr pellet is given for comparison. Bands of  $\text{C}_{60}$  are marked by asterisk “\*”.

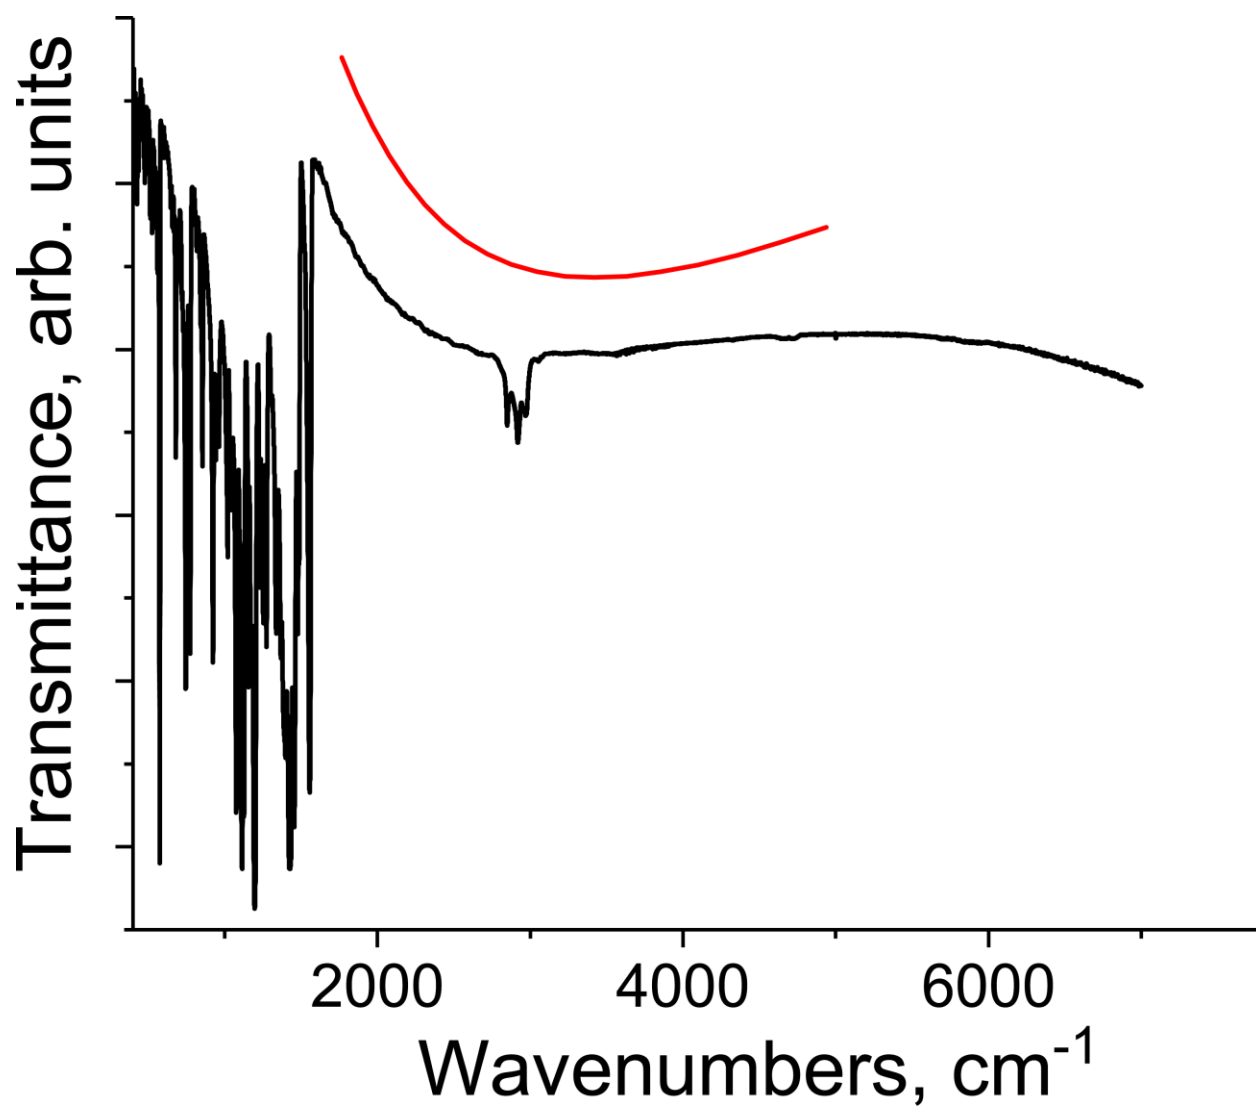

**Fig. S2.** Spectrum of (astrophloxine<sup>+</sup>)<sub>2</sub>(C<sub>60</sub><sup>•-</sup>)<sub>2</sub>·C<sub>6</sub>H<sub>4</sub>Cl<sub>2</sub>·C<sub>6</sub>H<sub>14</sub> (**1**) in a KBr pellet prepared in anaerobic conditions in the 400-7800 cm<sup>-1</sup> range. Charge transfer band with maximum at about 3300 cm<sup>-1</sup> is shown by red line.

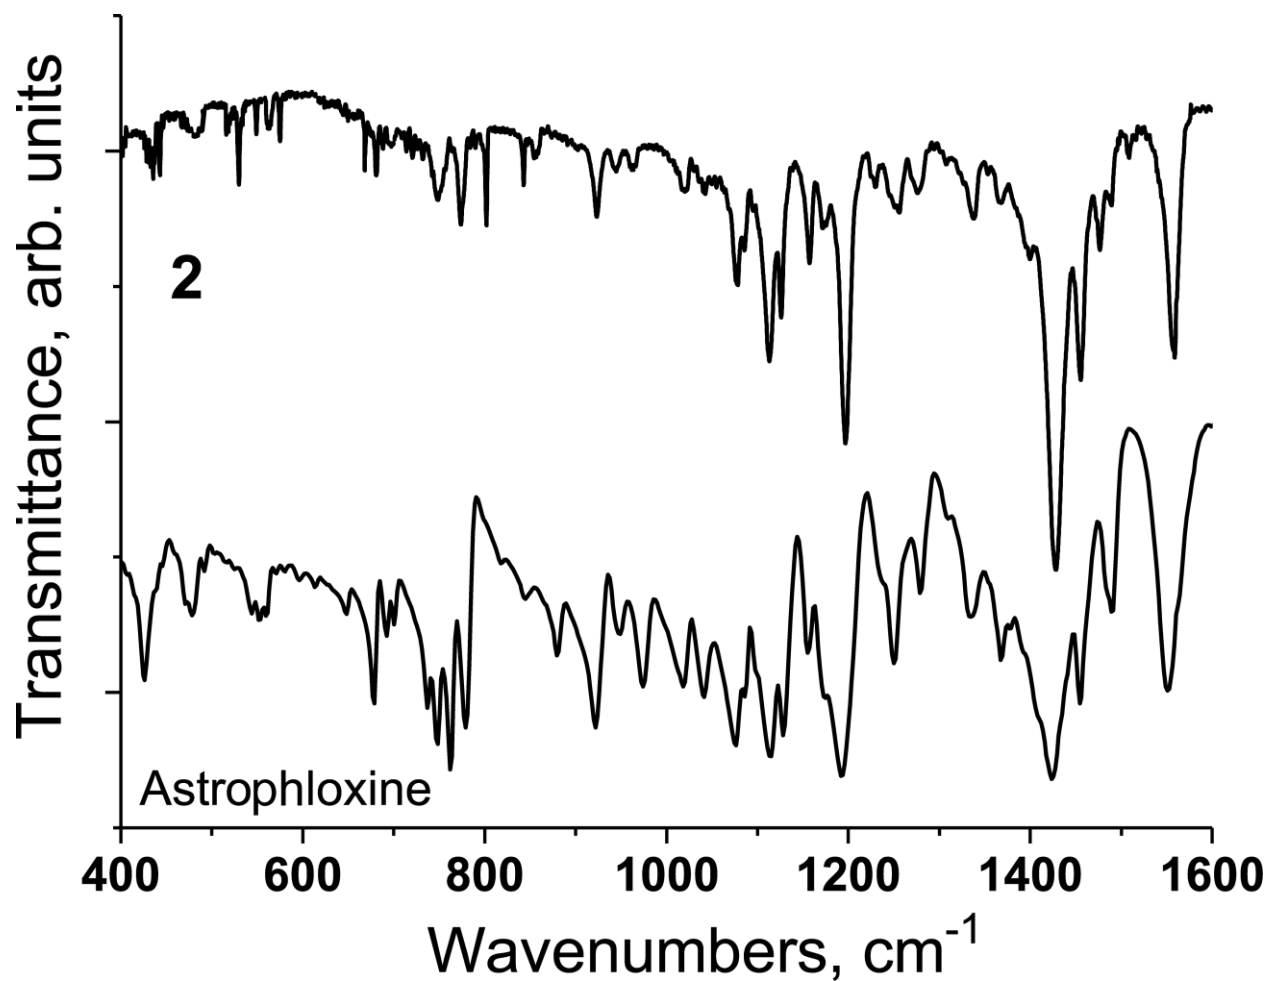

**Fig. S3.** Spectrum of  $(\text{astrophloxine}^+)_2(\text{C}_{70}^-)_2$  (**2**) in a KBr pellet prepared in anaerobic conditions. Spectrum of starting astrophloxine in a KBr pellet is given for comparison.

## The formation of contacts between fullerene dimers and cations

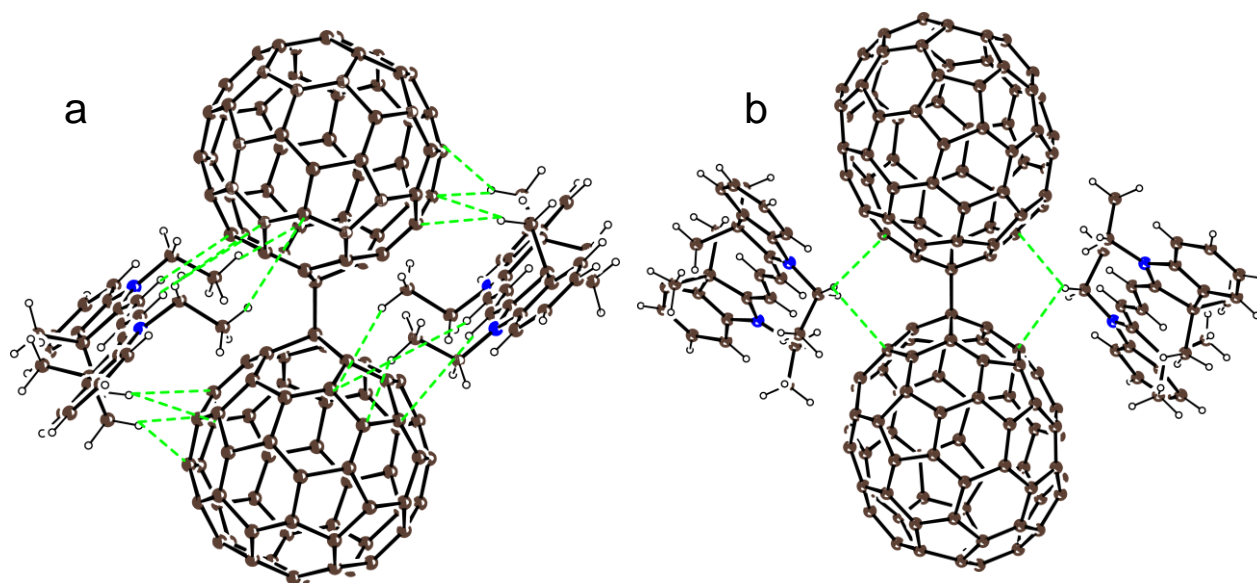

**Fig. S4.** Formation of short H(astrophloxine<sup>+</sup>)...C(Fullerene dimer) contacts in the crystal structure of **1** (for the dimeric (C<sub>60</sub>)<sub>2</sub> form in type I with the 58% occupancy) (a) and **2** (b). These contacts are shown by green dashed lines.

Fitting of SQUID data

Singlet-triplet (isolated dimer) model with Heisenberg Hamiltonian

$$\mathbf{H} = -2J(\mathbf{S}_1 \cdot \mathbf{S}_2)$$

$$\chi = \frac{2 N_A g^2 \mu_B^2}{3 k_B T} \times \frac{1}{1 + \frac{1}{3} \exp\left(-\frac{2J}{k_B T}\right)}$$

References are given in the main text.

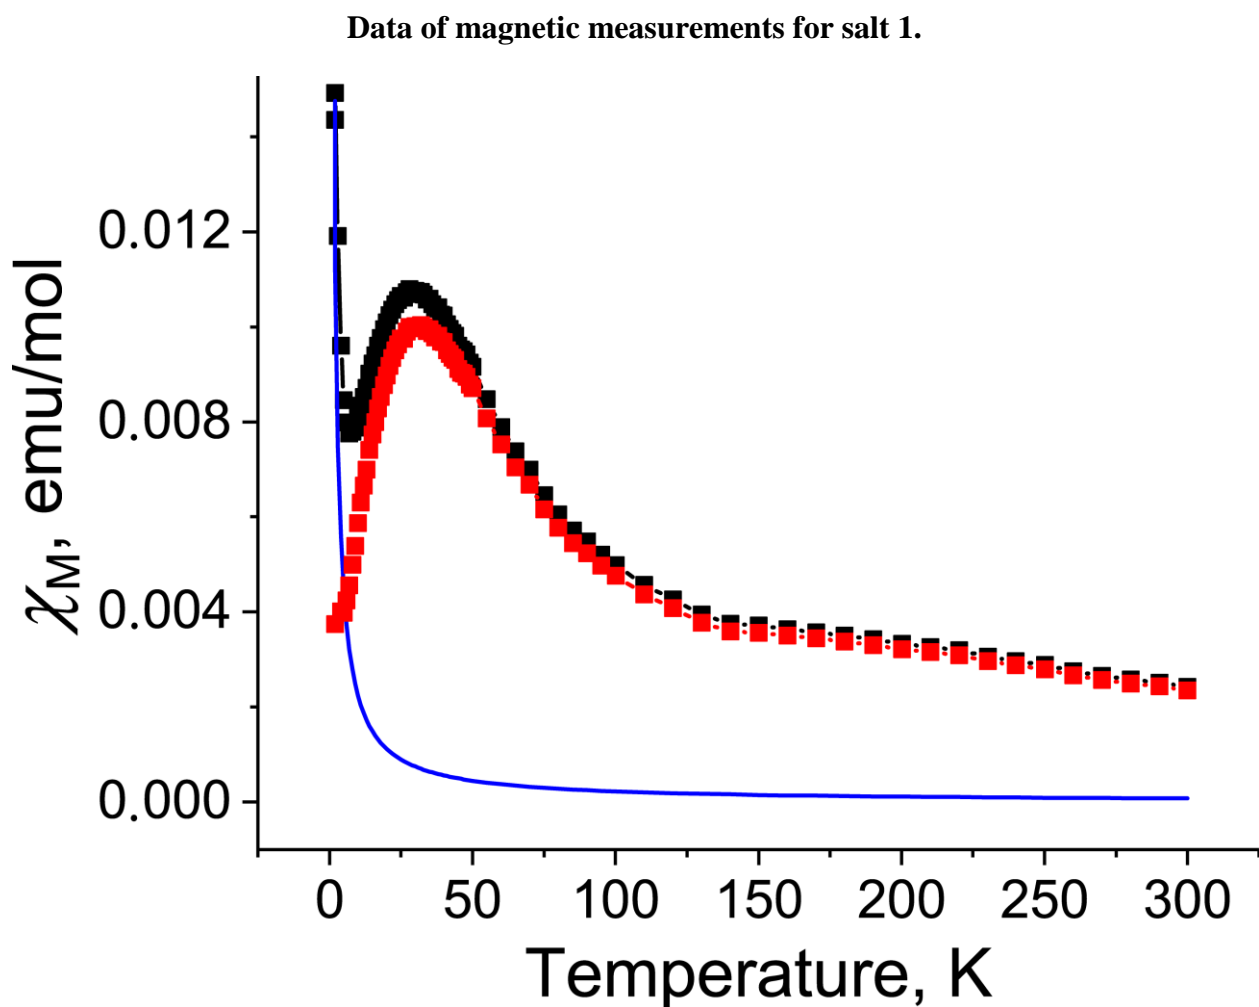

**Fig. S5.** Temperature dependence of molar magnetic susceptibility for polycrystalline **1** measured in the 1.9-300 K range (black squares). Two contributions can be resolved: from the Curie impurities (blue curve) originated from 3.8% of  $S = 1/2$  spins and from the sample (red curve with squares). The latter contribution is obtained by the subtraction of the contribution from the Curie impurities from the experimental curve.



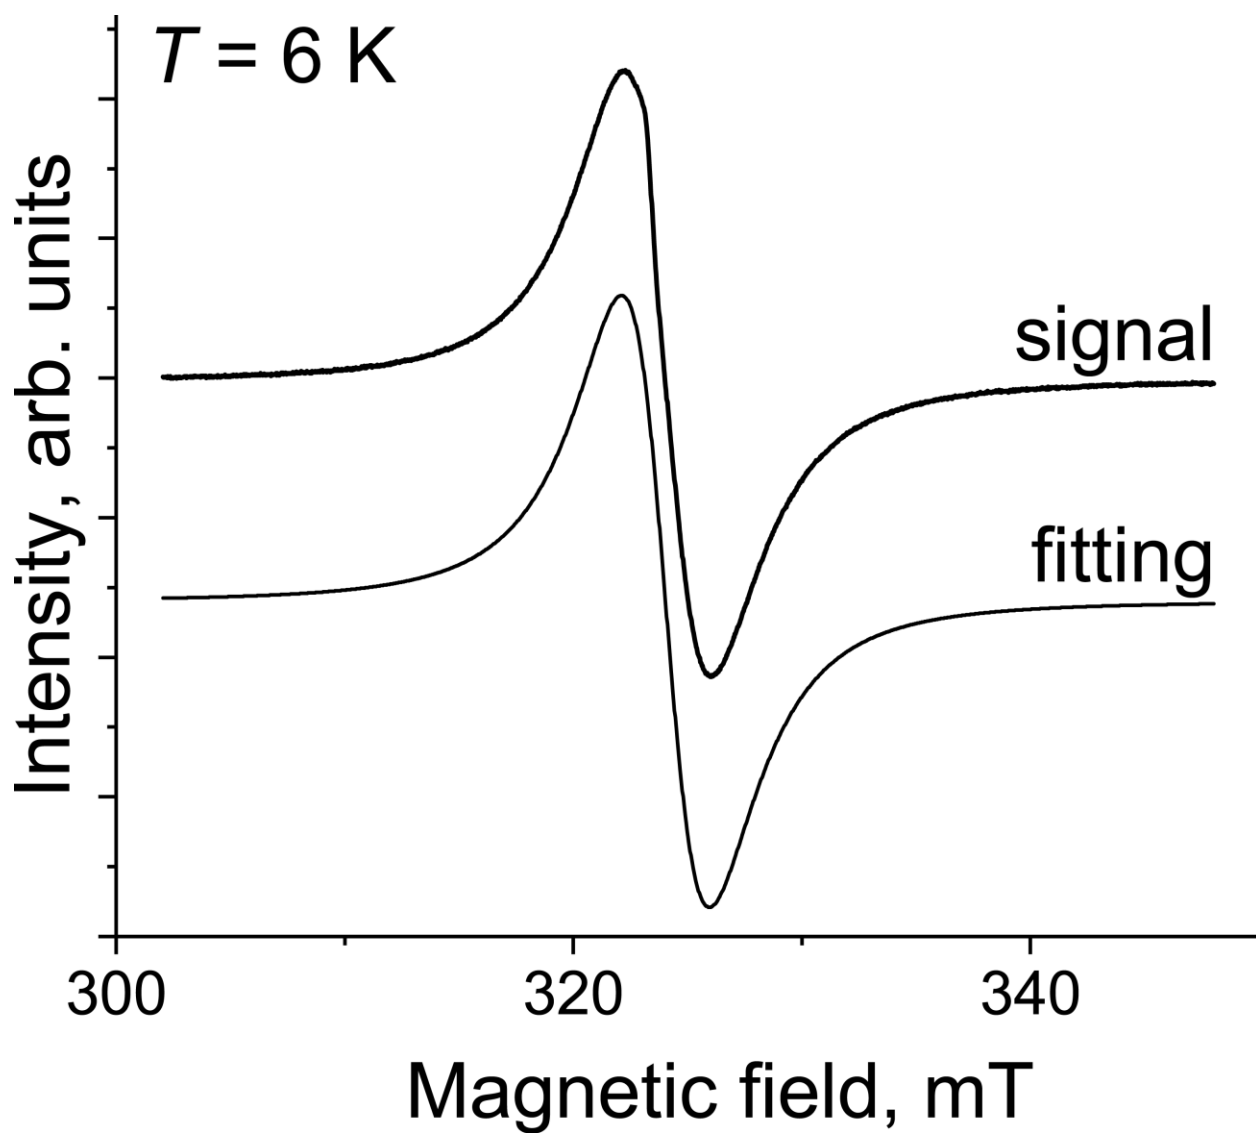

**Fig. S6.** EPR signal from polycrystalline **1** measured at 6 K. Signal was fitted by one Lorentzian line as shown below, parameters of this line are given in the main text.

Data of EPR measurements for salt 2.

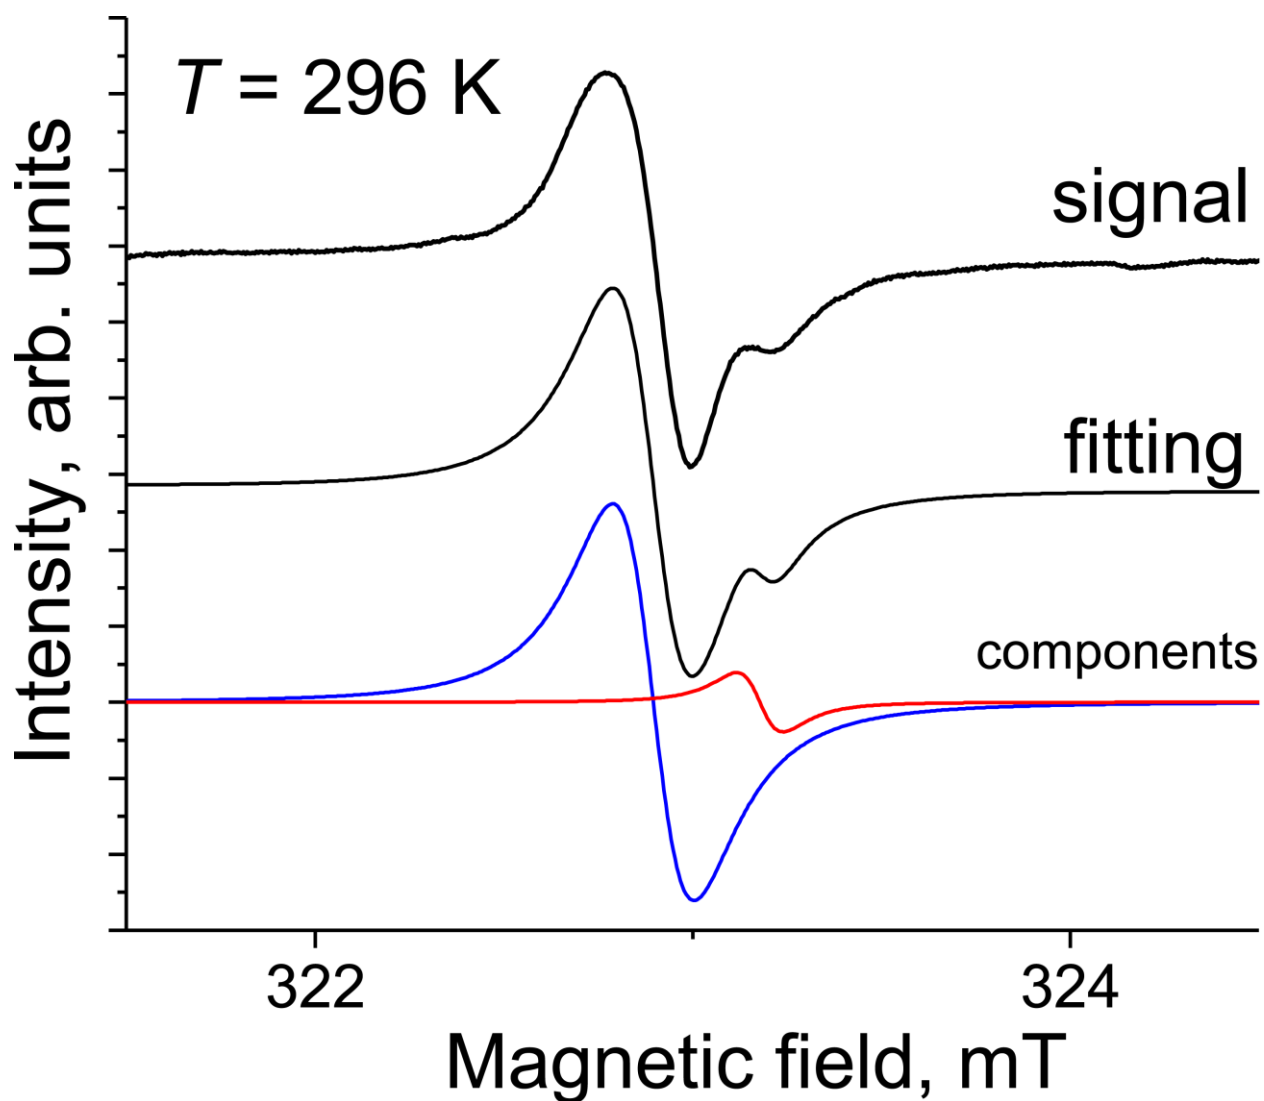

**Fig. S7.** EPR signal from polycrystalline **2** at 296 K, the signal was fitted by two narrow lines with  $g_1 = 2.0025$  and the linewidth of 0.21 mT and  $g_2 = 2.0008$  and the linewidth of 0.12 mT. This signal can be attributed to the paramagnetic impurities localized on fullerene  $C_{70}$  since integral intensity of the signal corresponds to the contribution of less than 1% of  $S = 1/2$  spins per one  $C_{70}$  anion.
